# Supplementary material for: Photocatalytic Activity of n-Alkylamine and n-Alkoxy Derivatives of Layered Perovskite-like Titanates H2Ln2Ti3O10 (Ln = La, Nd) in the Reaction of Hydrogen Production from an Aqueous Solution of Methanol
Source: MDPI journal article supplement (doi:10.3390/catal11111279), 2021-10-23

## Supporting Information S1

Diffuse reflectance spectra and Tauc plots for the initial protonated titanates

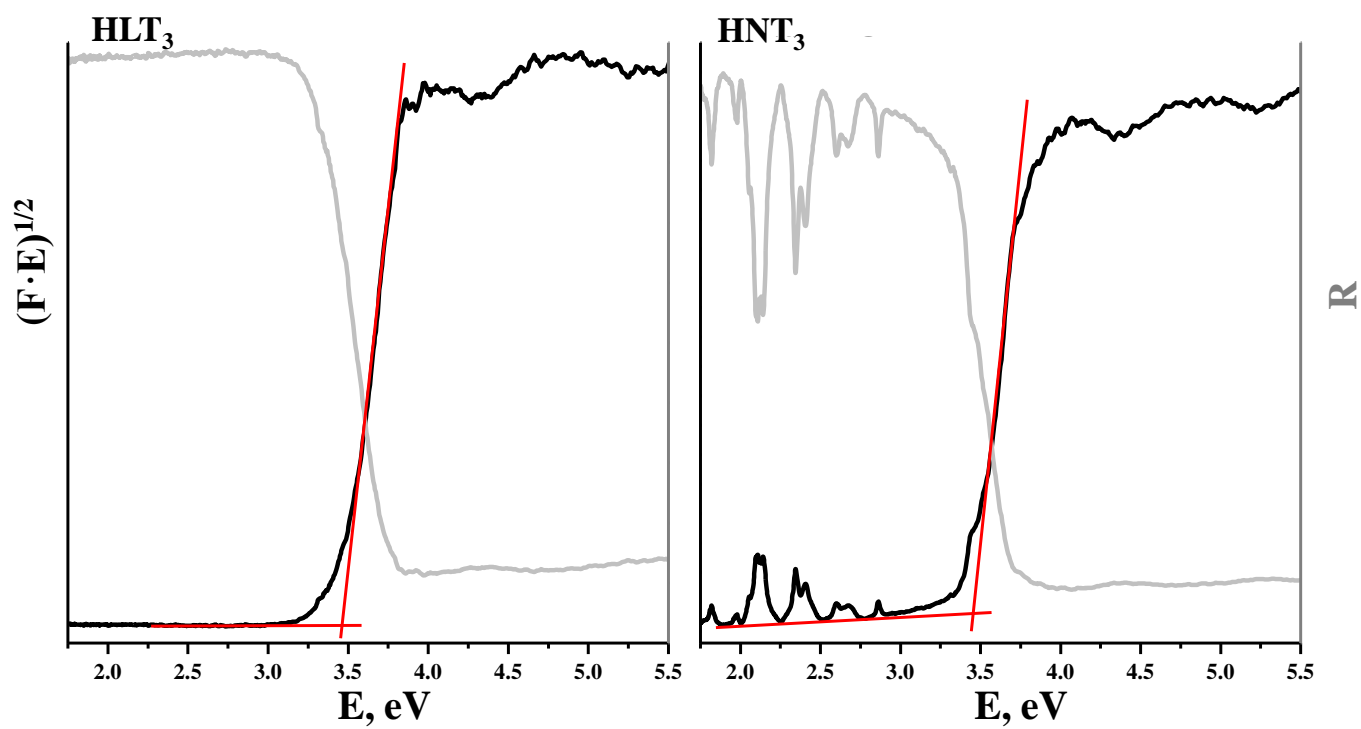

## Supporting Information S2

### Diffuse reflectance spectra and Tauc plots for inorganic-organic derivatives

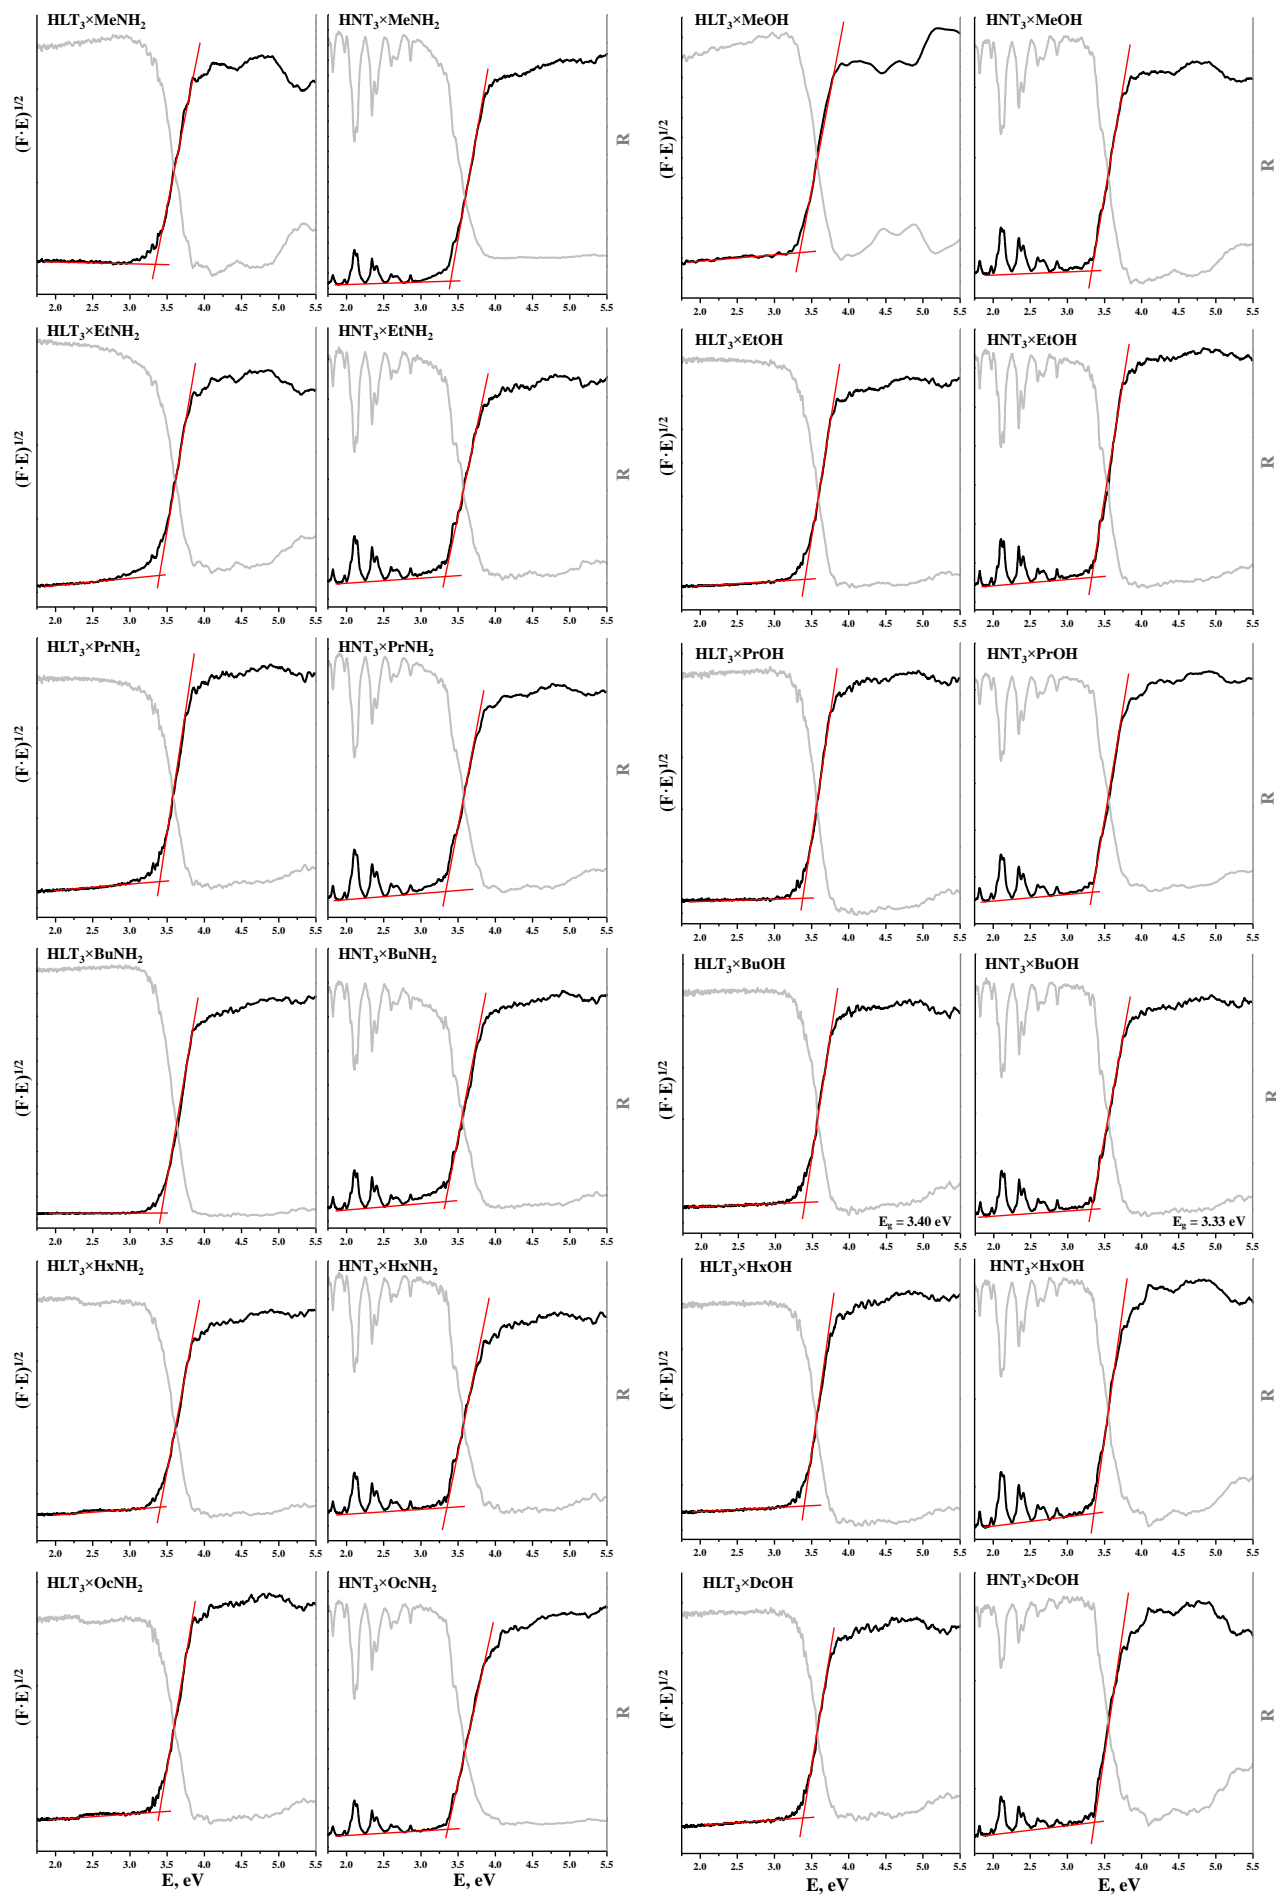

## Supporting Information S3

SEM images of  $\text{HLT}_3$  and its inorganic-organic derivatives

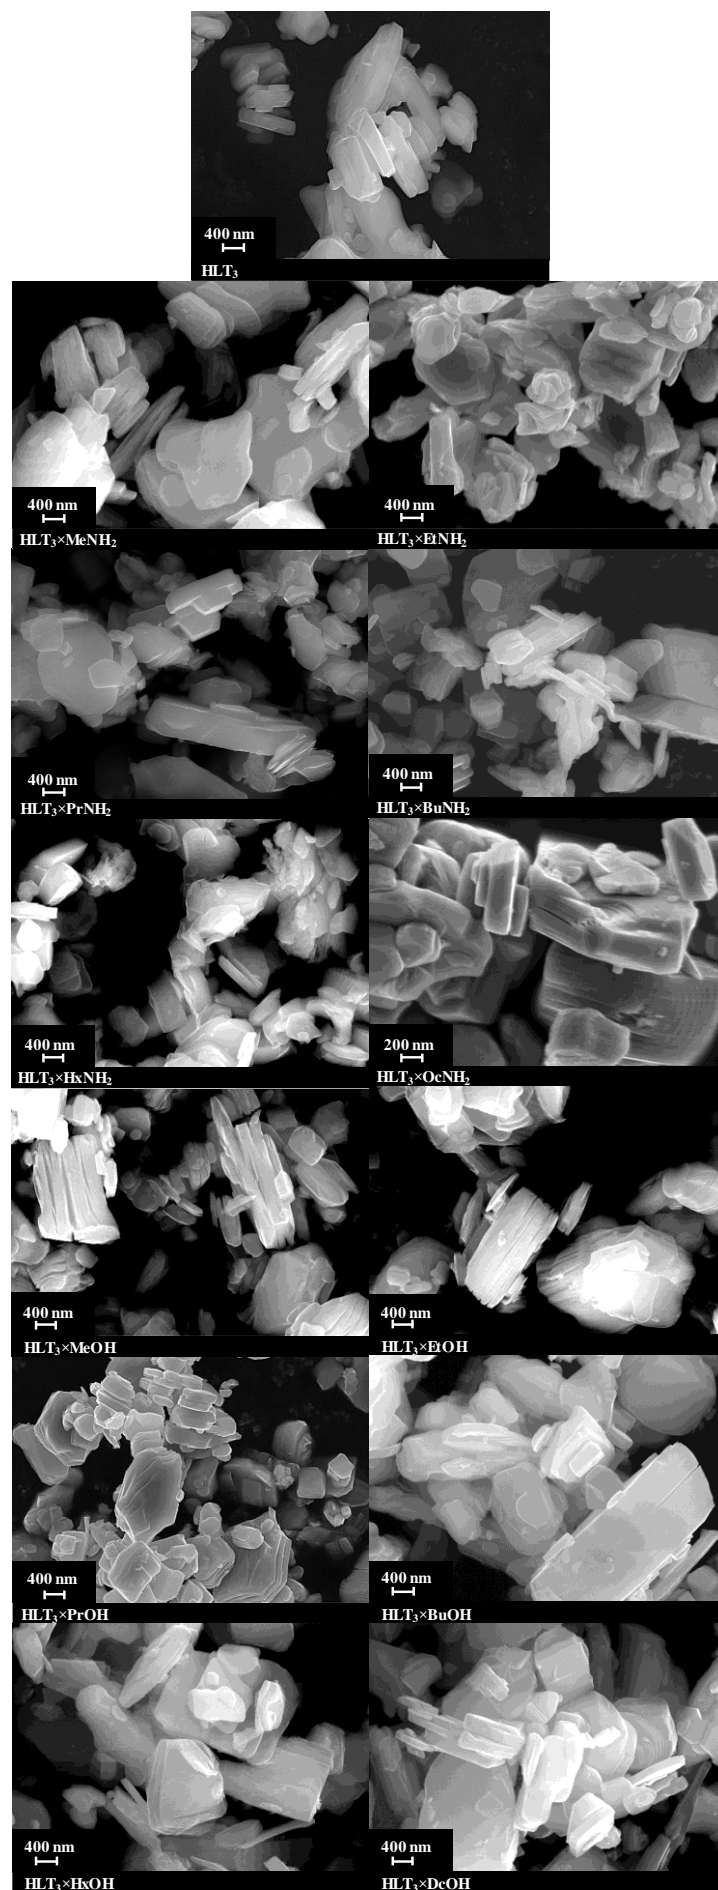

## Supporting Information S4

SEM images of HNT<sub>3</sub> and its inorganic-organic derivatives

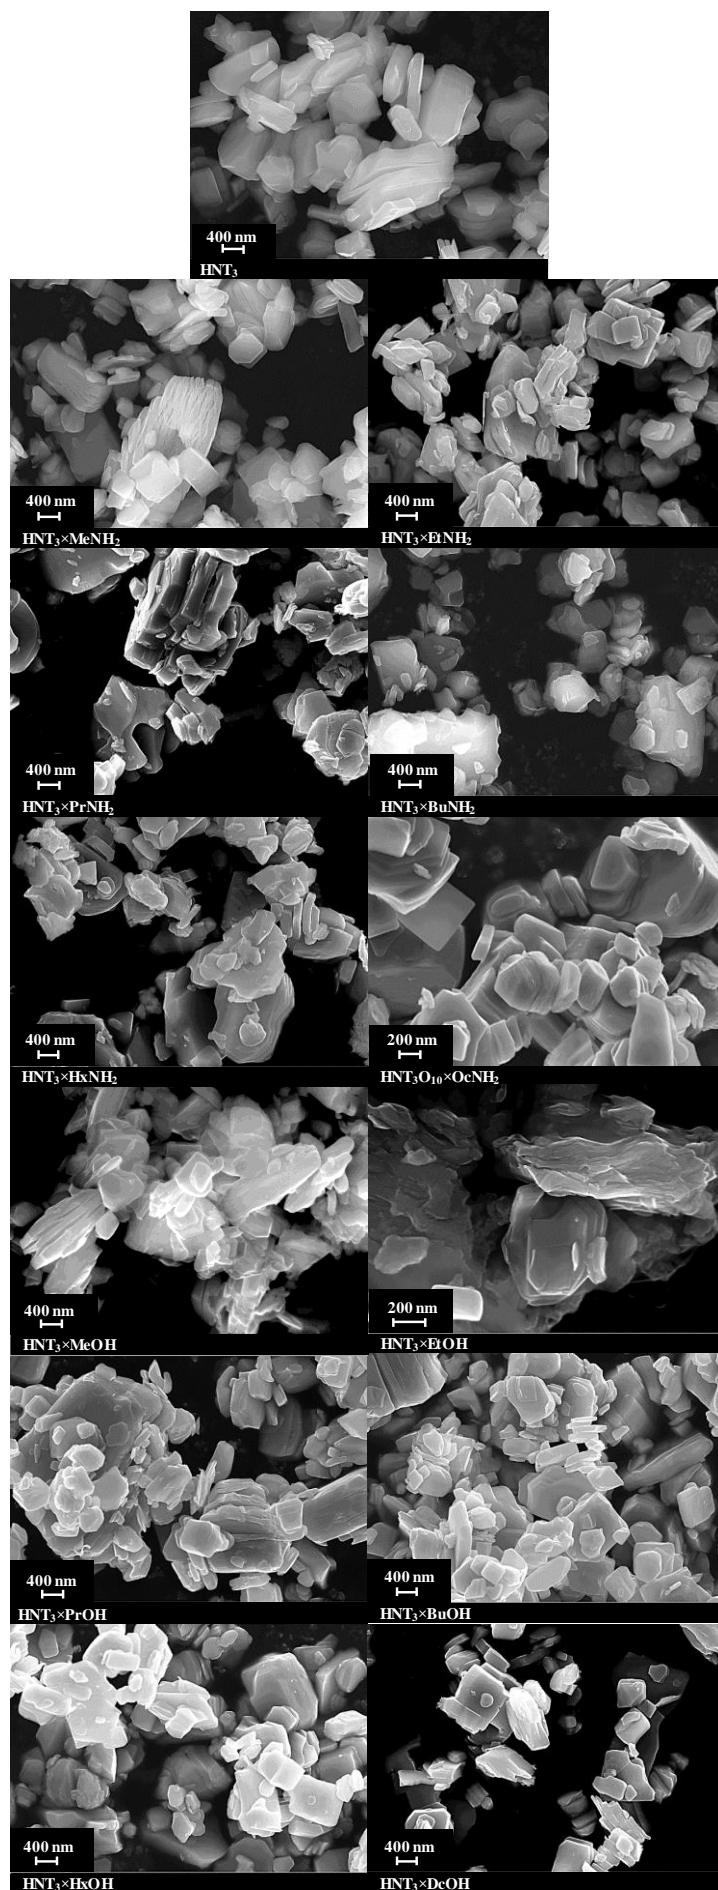

## Supporting Information S5

### TG analysis of the initial protonated titanates and their inorganic-organic derivatives

TG curves of the protonated precursors and hybrid compounds shown below were recorded in an oxidative atmosphere. Thermal degradation of the protonated samples includes two stages. The first of them relates to the temperatures below 275°C and corresponds to deintercalation of interlayer water with the formation of the anhydrous titanate. The second one (275–450°C) is referred to topochemical condensation of the latter, which is known to consist in combining of interlayer oxygen anions and protons in water molecules whose liberation is followed by closing adjacent perovskite blocks. Thus, the final products of thermolysis can be described by gross formulae  $\text{Ln}_2\text{Ti}_3\text{O}_9$ . Thermal degradation of the hybrid inorganic-organic compounds represents a more complex process. Based on the behavior of their TG curves and the data of the simultaneous thermal analysis coupled with mass spectroscopy (STA-mass) presented for the kindred Ruddlesden-Popper titanates in our previous reports, the following thermolysis mechanism can be suggested. Decomposition of the *n*-alkylamine compounds starts with evolution of interlayer water and amine molecules proceeding in the range of 50–250°C. Their joint liberation, apparently associated with strong hydrogen bonding, makes it impossible to separate mass loss values caused by the removal of each of the interlayer components. The subsequent course of the curves shows that the *n*-alkylamine deintercalation does not occur fully and its completeness declines with growing of the amine chain length. In the temperature range of 275–450°C, topochemical dehydration of the protonated titanate matrix and, potentially, partial decay of the residual *n*-alkylamine occur. The subsequent thermolysis stage (450–600°C) is characterized by the mass gain explained by partial oxidation of the carbon-containing interlayer component. TG data do not allow rigorously establishing the specific form the carbon existence under these conditions. Further heating (600–900°C) results in its complete oxidation to carbon dioxide, which provides the corresponding mass loss and the plateau curve output referred to the mass of the solid inorganic residue. The initial section on the curves of the *n*-alkoxy compounds (50–250°C) relates to interlayer water deintercalation; in the case of the *n*-decoxy compounds, it might be also referred to residual *n*-heptane liberation, which served as a solvent during synthesis. Heating up to 300–350°C is accompanied by partial degradation of *n*-alkoxy groups and topochemical condensation of the titanate via the free vertices of interlayer titanium-oxygen octahedra. Subsequent heating (400–650°C) provides the pronounced mass gain because of the partial oxidation of the residual carbon-containing component, whose main part appears to preserve in the sample at the beginning of this section. In the high temperature region (650–900°C), like in the case of the *n*-alkylamine compounds, the carbon residue completely burns out forming carbon dioxide. However, liberation of molecular alcohols does not take place at any stage of thermolysis, which consists with covalent nature of the *n*-alkoxy derivatives.

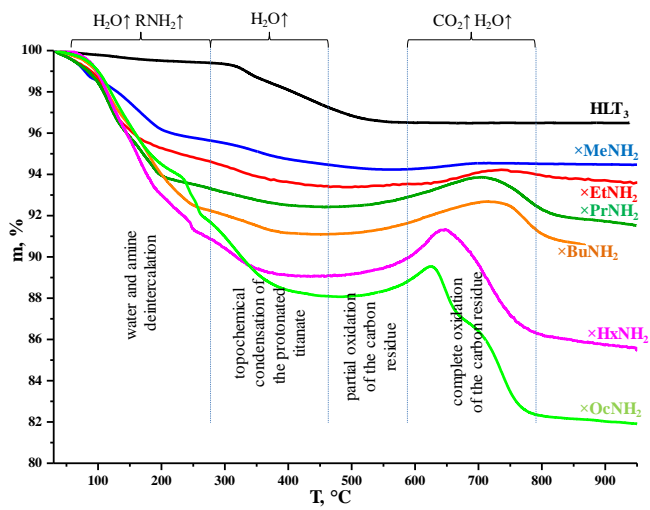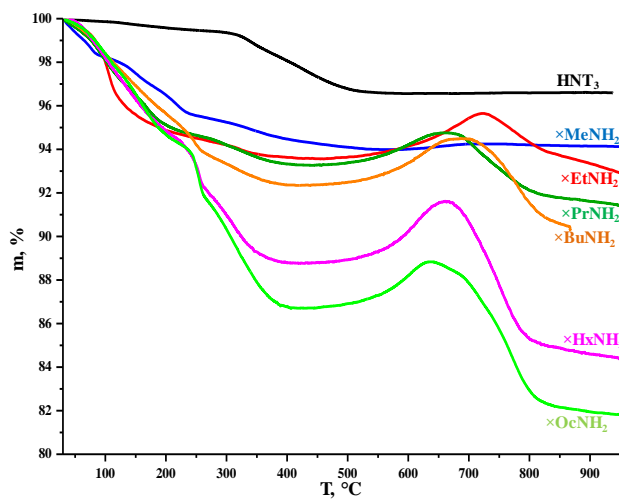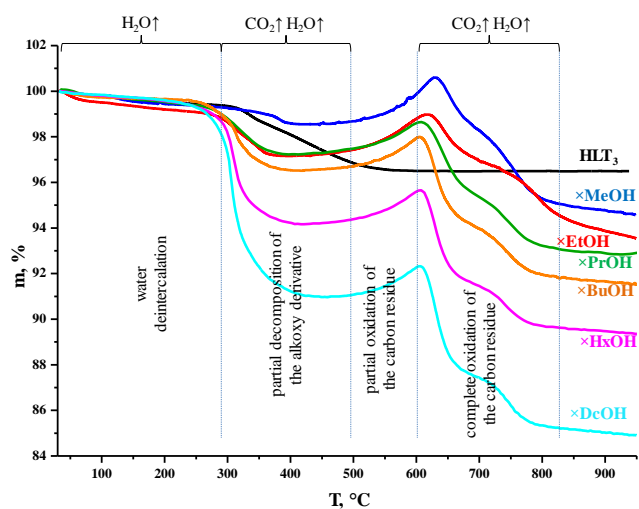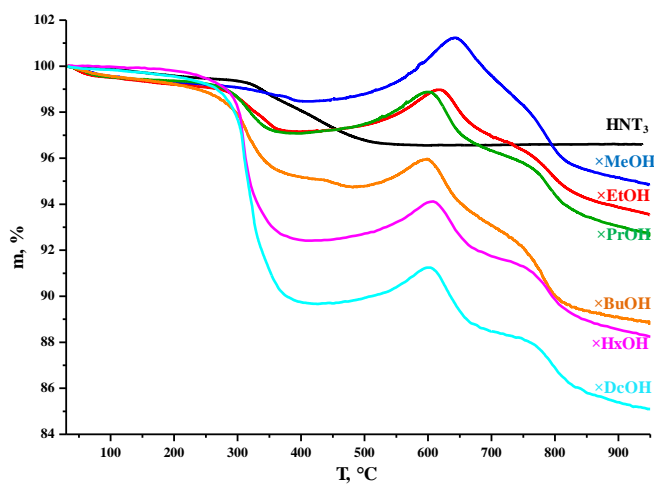

### Supporting Information S6

Data on vacuum stability of inorganic-organic derivatives

| Sample                              | Total mass loss, % |             |
|-------------------------------------|--------------------|-------------|
|                                     | 5 d vacuum         | 10 d vacuum |
| HLT <sub>3</sub> ×MeNH <sub>2</sub> | 2.82               | 2.85        |
| HNT <sub>3</sub> ×MeNH <sub>2</sub> | 2.76               | 2.78        |
| HLT <sub>3</sub> ×BuNH <sub>2</sub> | 2.26               | 2.28        |
| HNT <sub>3</sub> ×BuNH <sub>2</sub> | 2.09               | 2.12        |
| HLT <sub>3</sub> ×OcNH <sub>2</sub> | 1.04               | 1.04        |
| HNT <sub>3</sub> ×OcNH <sub>2</sub> | 1.02               | 1.02        |
| HLT <sub>3</sub> ×MeOH              | 0.00               | 0.00        |
| HNT <sub>3</sub> ×MeOH              | 0.17               | 0.18        |
| HLT <sub>3</sub> ×BuOH              | 0.65               | 0.66        |
| HNT <sub>3</sub> ×BuOH              | 0.57               | 0.57        |
| HLT <sub>3</sub> ×DcOH              | 0.49               | 0.49        |
| HNT <sub>3</sub> ×DcOH              | 0.43               | 0.43        |

## Supporting Information S7

Raman spectra of some inorganic-organic derivatives before and after 10 d keeping under vacuum

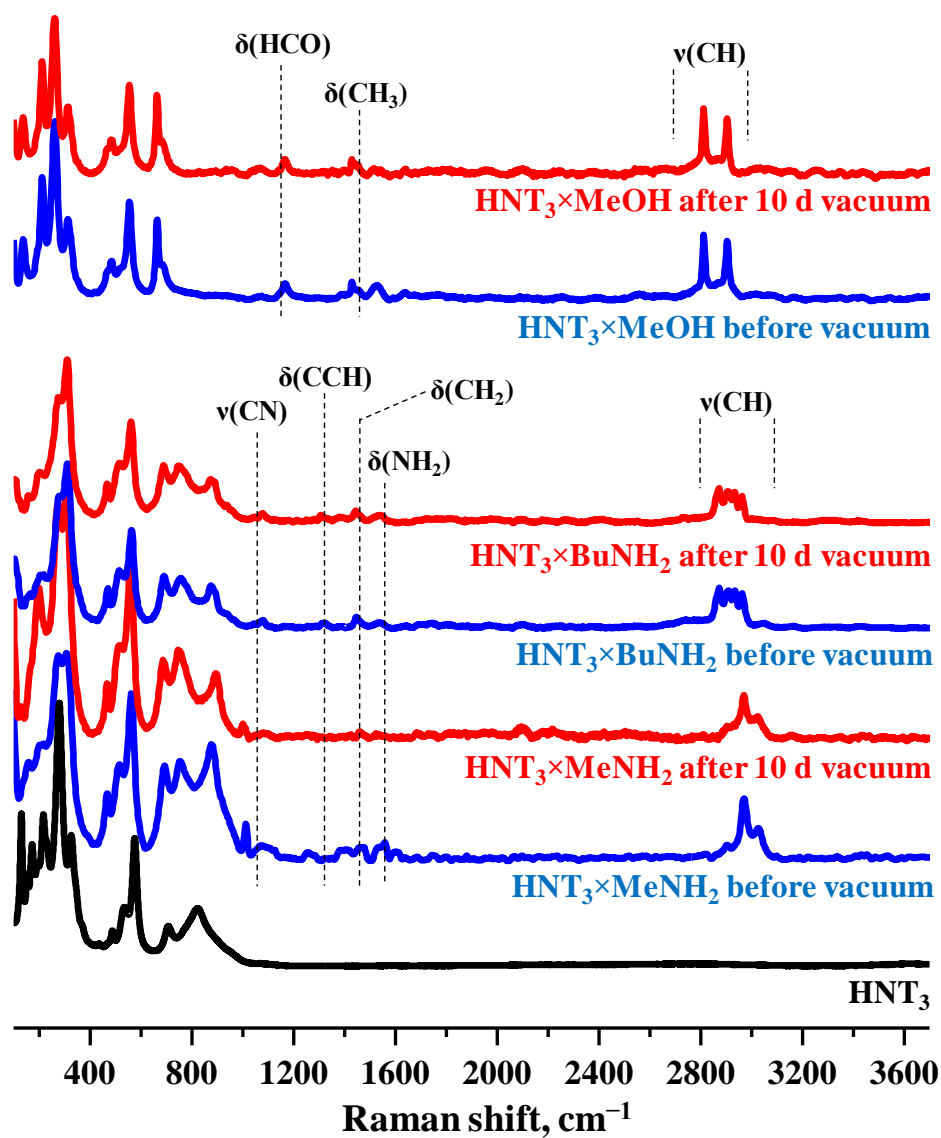



# Supporting Information S8

XRD patterns of Nd-containing inorganic-organic derivatives before and after 10 d water treatment

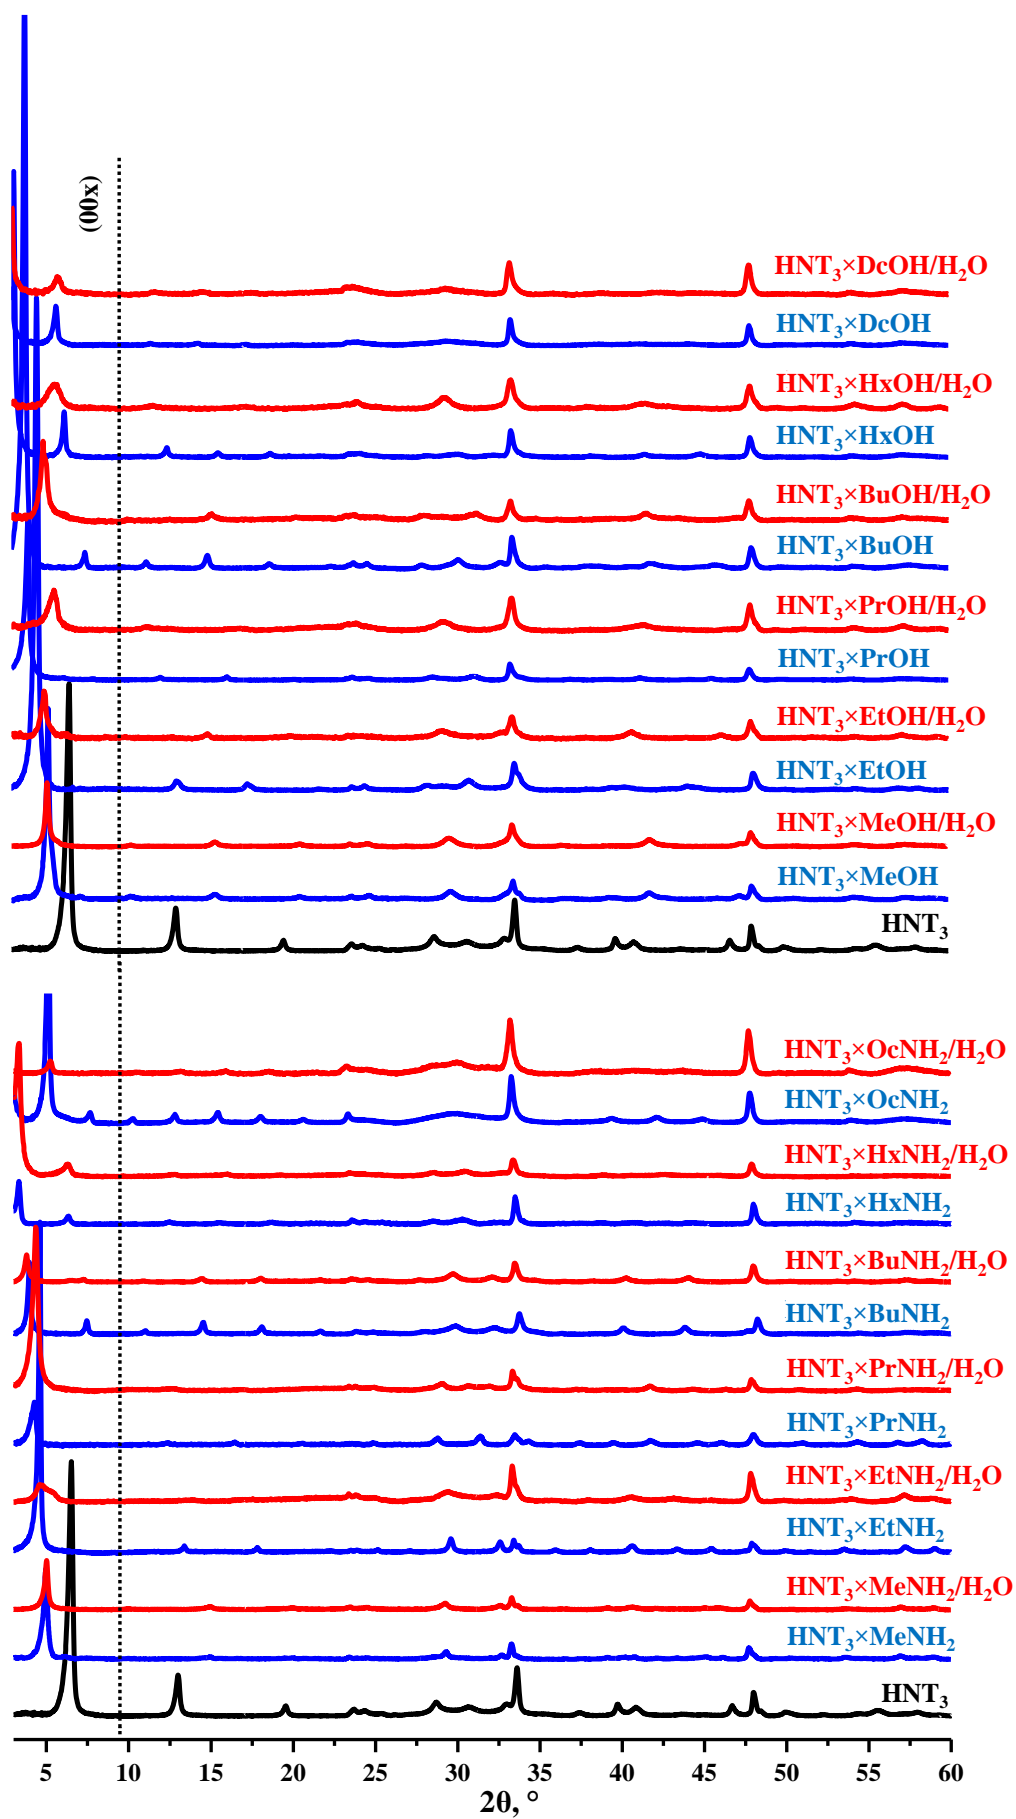

## Supporting Information S9

Full kinetic curves of photocatalytic hydrogen generation over initial protonated titanates and their composites with Pt as a cocatalyst

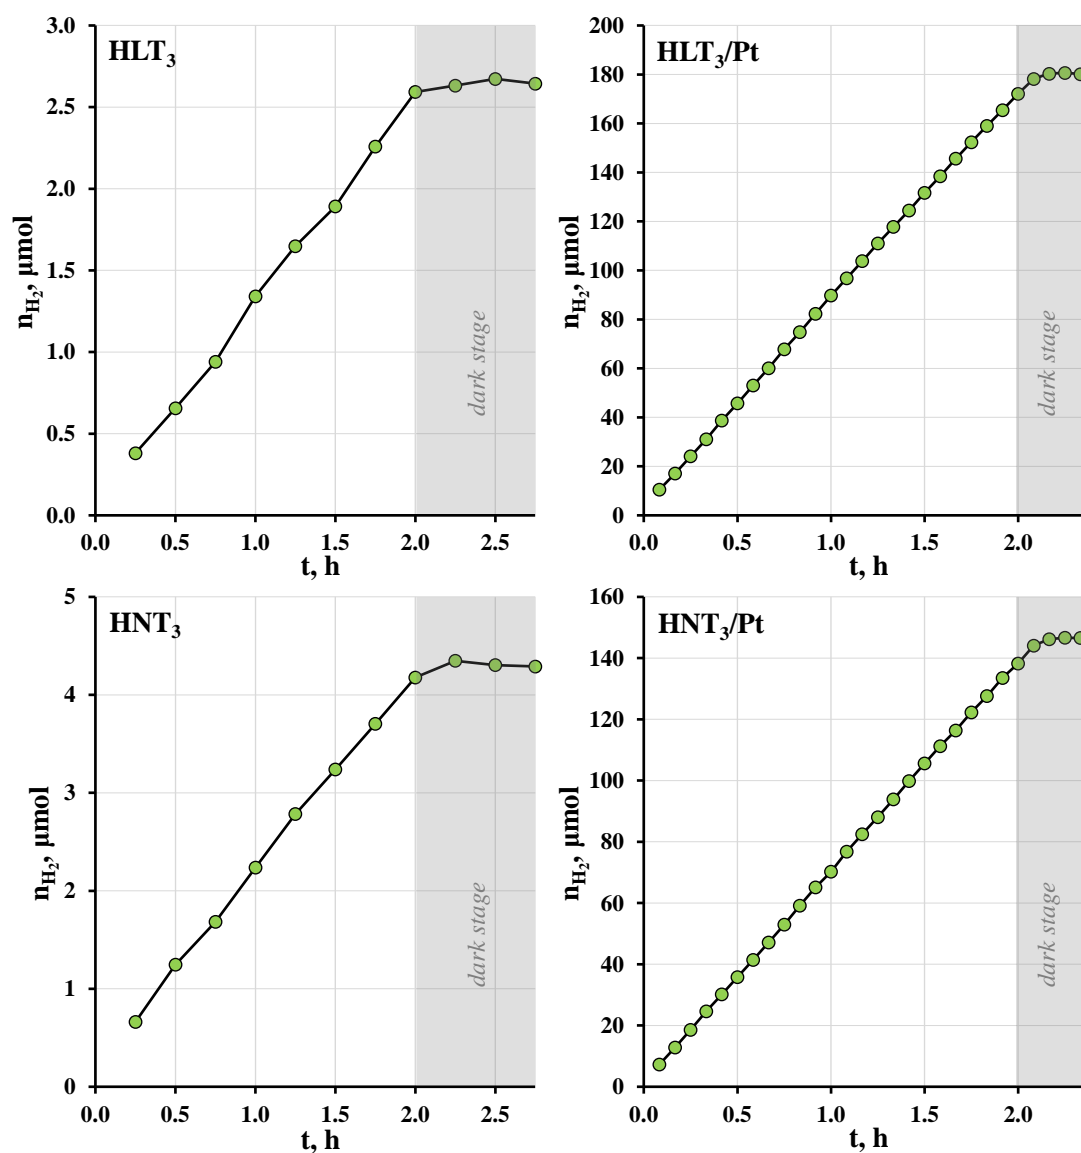

## Supporting Information S10

Full kinetic curves of photocatalytic hydrogen generation over *n*-alkylamine derivatives and their composites with Pt as a cocatalyst

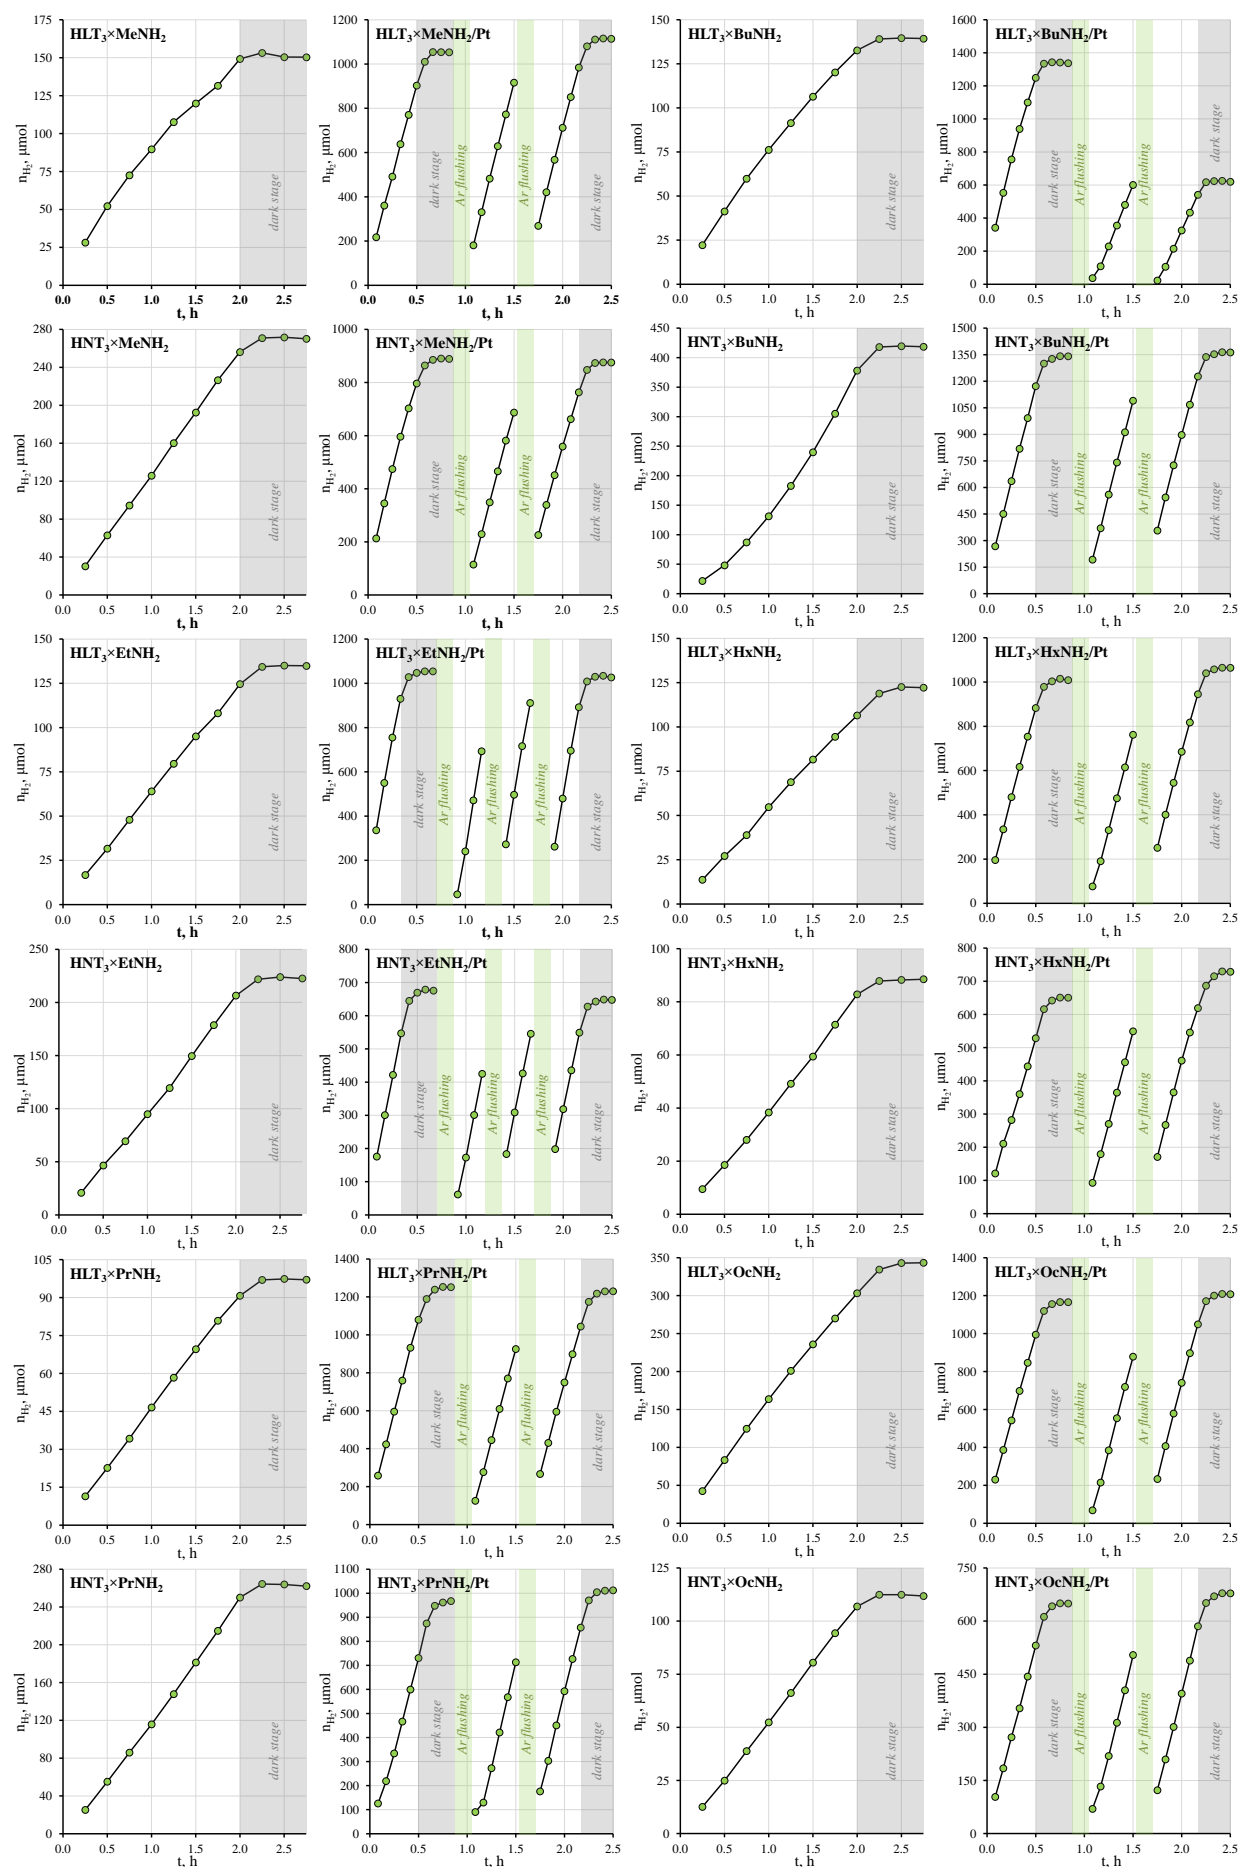

## Supporting Information S11

Full kinetic curves of photocatalytic hydrogen generation over *n*-alkoxy derivatives and their composites with Pt as a cocatalyst

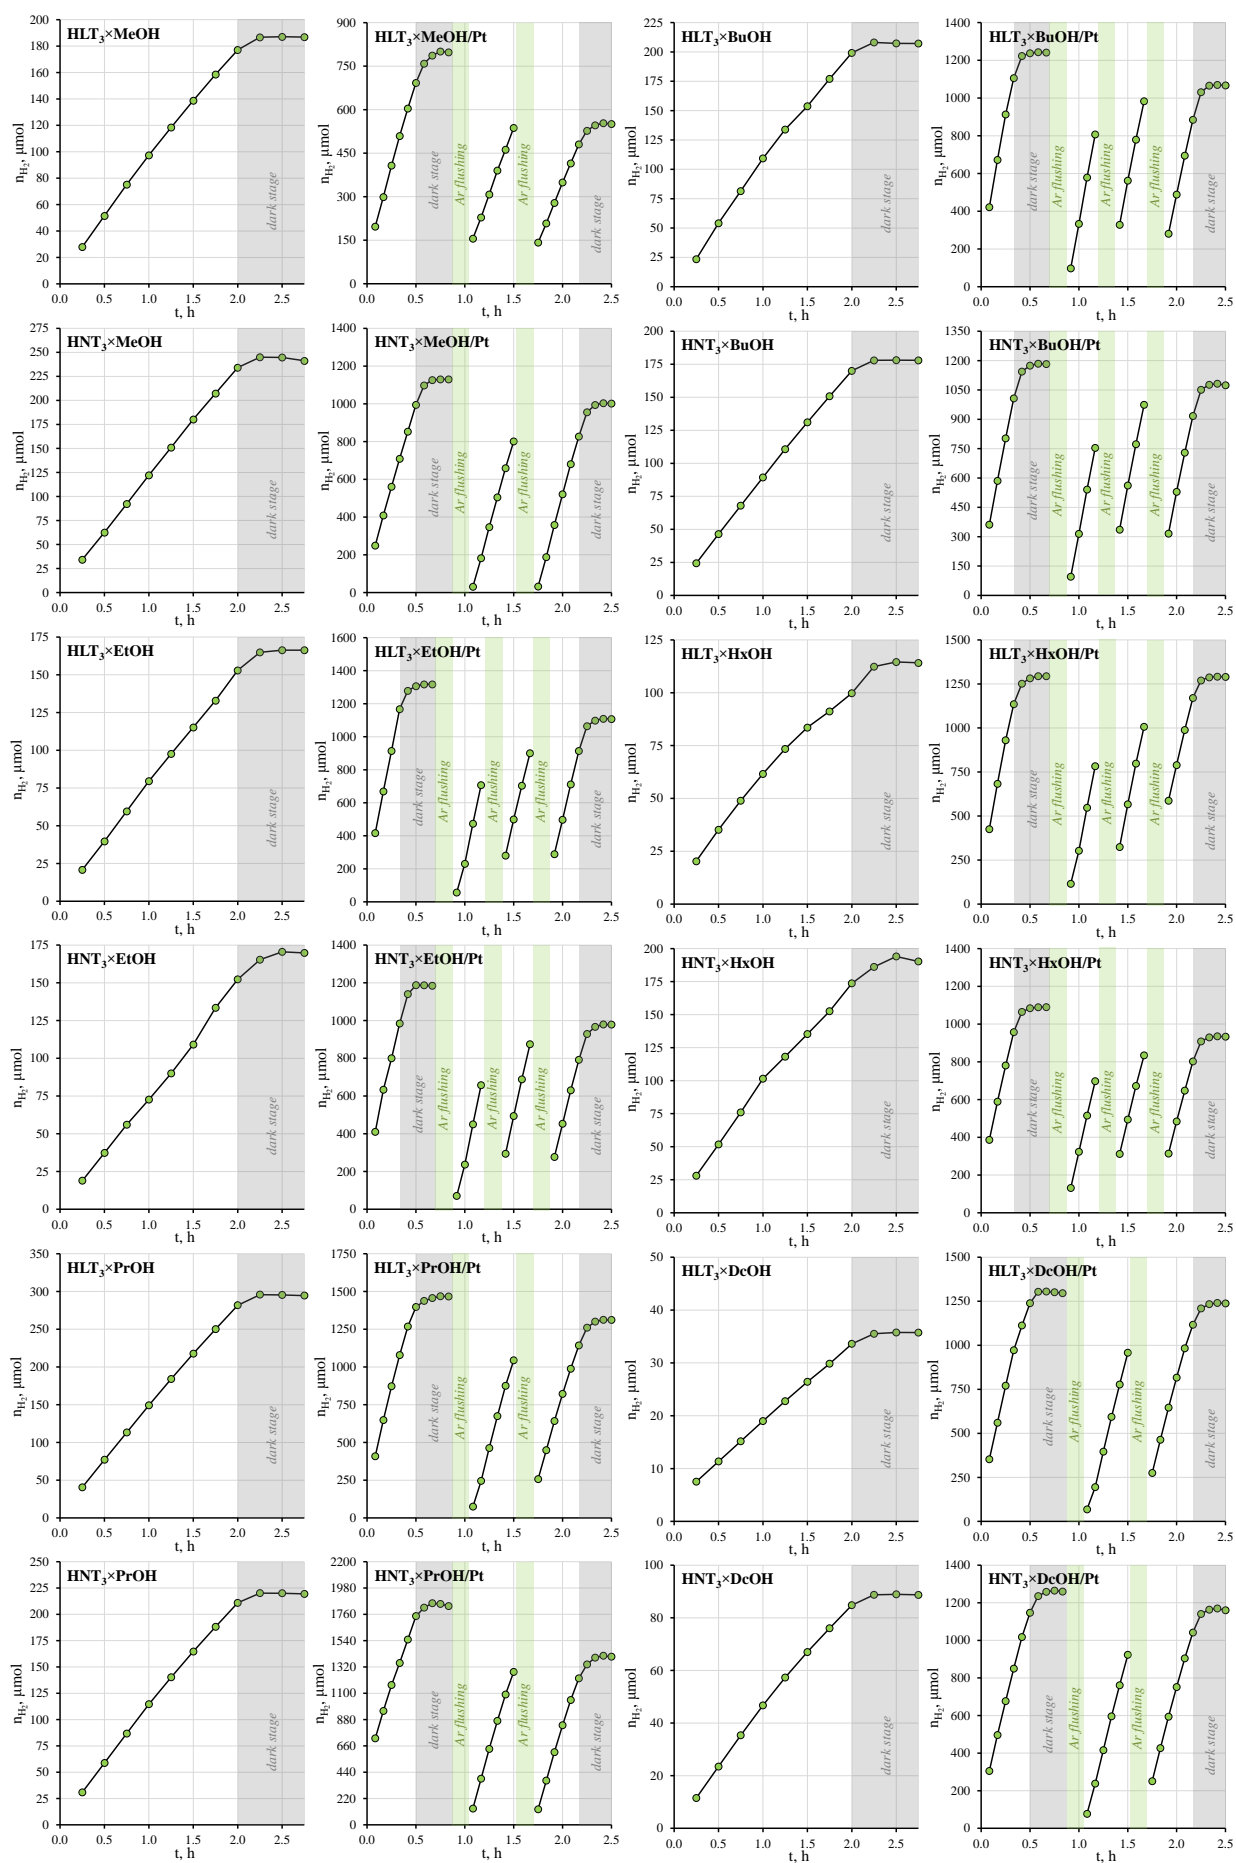

## Supporting Information S12

Actual volume concentrations and pH values of reaction suspensions of La-containing samples

| Photocatalyst                           | c <sub>1</sub> , mg/l | c <sub>2</sub> , mg/l | c <sub>3</sub> , mg/l | pH <sub>1</sub> | pH <sub>2</sub> | pH <sub>3</sub> |
|-----------------------------------------|-----------------------|-----------------------|-----------------------|-----------------|-----------------|-----------------|
| HLT <sub>3</sub>                        | 317                   | 183                   | 0.3                   | 5.3             | 5.4             | 5.2             |
| HLT <sub>3</sub> /Pt                    | 205                   | 109                   | –                     | 4.4             | 4.4             | 4.3             |
| HLT <sub>3</sub> ×MeNH <sub>2</sub>     | 327                   | 109                   | 0.3                   | 7.5             | 5.3             | 5.1             |
| HLT <sub>3</sub> ×MeNH <sub>2</sub> /Pt | 188                   | 63.5                  | –                     | 3.7             | 3.1             | 3.1             |
| HLT <sub>3</sub> ×EtNH <sub>2</sub>     | 497                   | 454                   | 0.6                   | 8.1             | 7.2             | 6.7             |
| HLT <sub>3</sub> ×EtNH <sub>2</sub> /Pt | 439                   | 291                   | –                     | 4.0             | 3.3             | 3.3             |
| HLT <sub>3</sub> ×PrNH <sub>2</sub>     | 331                   | 325                   | 0.8                   | 7.9             | 7.5             | 7.5             |
| HLT <sub>3</sub> ×PrNH <sub>2</sub> /Pt | 285                   | 135                   | –                     | 4.2             | 3.4             | 3.4             |
| HLT <sub>3</sub> ×BuNH <sub>2</sub>     | 345                   | 344                   | 0.7                   | 8.5             | 6.9             | 7.2             |
| HLT <sub>3</sub> ×BuNH <sub>2</sub> /Pt | 347                   | 96.6                  | –                     | 4.4             | 3.6             | 3.6             |
| HLT <sub>3</sub> ×HxNH <sub>2</sub>     | 307                   | 301                   | 0.7                   | 8.6             | 7.7             | 7.7             |
| HLT <sub>3</sub> ×HxNH <sub>2</sub> /Pt | 273                   | 156                   | –                     | 4.5             | 3.6             | 3.6             |
| HLT <sub>3</sub> ×OcNH <sub>2</sub>     | 354                   | 20.2                  | 0.5                   | 8.7             | 5.8             | 5.6             |
| HLT <sub>3</sub> ×OcNH <sub>2</sub> /Pt | 314                   | 274                   | –                     | 4.3             | 3.5             | 3.5             |
| HLT <sub>3</sub> ×MeOH                  | 269                   | 240                   | 0.6                   | 4.2             | 3.7             | 3.7             |
| HLT <sub>3</sub> ×MeOH/Pt               | 230                   | 57.2                  | –                     | 3.5             | 3.1             | 3.1             |
| HLT <sub>3</sub> ×EtOH                  | 190                   | 171                   | 0.0                   | 5.1             | 4.4             | 4.3             |
| HLT <sub>3</sub> ×EtOH/Pt               | 229                   | 155                   | –                     | 3.5             | 3.1             | 3.1             |
| HLT <sub>3</sub> ×PrOH                  | 242                   | 174                   | 0.4                   | 5.0             | 3.8             | 3.7             |
| HLT <sub>3</sub> ×PrOH/Pt               | 88.1                  | 42.7                  | –                     | 3.5             | 3.1             | 3.0             |
| HLT <sub>3</sub> ×BuOH                  | 180                   | 139                   | 0.3                   | 5.0             | 4.1             | 4.1             |
| HLT <sub>3</sub> ×BuOH/Pt               | 145                   | 78.0                  | –                     | 3.4             | 3.1             | 3.0             |
| HLT <sub>3</sub> ×HxOH                  | 144                   | 108                   | 0.2                   | 4.9             | 4.8             | 4.6             |
| HLT <sub>3</sub> ×HxOH/Pt               | 132                   | 100                   | –                     | 3.5             | 3.1             | 3.0             |
| HLT <sub>3</sub> ×DcOH                  | 81.3                  | 61.6                  | 0.2                   | 4.8             | 4.8             | 4.7             |
| HLT <sub>3</sub> ×DcOH/Pt               | 217                   | 216                   | –                     | 3.6             | 3.1             | 3.1             |

### Supporting Information S13

Actual volume concentrations and pH values of reaction suspensions of Nd-containing samples

| Photocatalyst                           | c <sub>1</sub> , mg/l | c <sub>2</sub> , mg/l | c <sub>3</sub> , mg/l | pH <sub>1</sub> | pH <sub>2</sub> | pH <sub>3</sub> |
|-----------------------------------------|-----------------------|-----------------------|-----------------------|-----------------|-----------------|-----------------|
| HNT <sub>3</sub>                        | 247                   | 205                   | 0.6                   | 6.8             | 4.3             | 4.2             |
| HNT <sub>3</sub> /Pt                    | 165                   | 72.2                  | –                     | 4.6             | 4.6             | 4.6             |
| HNT <sub>3</sub> ×MeNH <sub>2</sub>     | 309                   | 120                   | 0.6                   | 7.4             | 4.0             | 4.0             |
| HNT <sub>3</sub> ×MeNH <sub>2</sub> /Pt | 223                   | 65.3                  | –                     | 3.7             | 3.2             | 3.2             |
| HNT <sub>3</sub> ×EtNH <sub>2</sub>     | 491                   | 239                   | 0.4                   | 7.8             | 4.8             | 4.7             |
| HNT <sub>3</sub> ×EtNH <sub>2</sub> /Pt | 441                   | 186                   | –                     | 4.5             | 3.7             | 3.7             |
| HNT <sub>3</sub> ×PrNH <sub>2</sub>     | 331                   | 72.5                  | 0.5                   | 8.3             | 5.0             | 4.9             |
| HNT <sub>3</sub> ×PrNH <sub>2</sub> /Pt | 320                   | 80.5                  | –                     | 6.9             | 3.5             | 3.5             |
| HNT <sub>3</sub> ×BuNH <sub>2</sub>     | 441                   | 93.0                  | 0.8                   | 8.2             | 5.0             | 4.9             |
| HNT <sub>3</sub> ×BuNH <sub>2</sub> /Pt | 399                   | 352                   | –                     | 4.1             | 3.1             | 3.1             |
| HNT <sub>3</sub> ×HxNH <sub>2</sub>     | 301                   | 240                   | 1.3                   | 8.4             | 7.4             | 7.5             |
| HNT <sub>3</sub> ×HxNH <sub>2</sub> /Pt | 267                   | 245                   | –                     | 4.8             | 3.7             | 3.7             |
| HNT <sub>3</sub> ×OcNH <sub>2</sub>     | 322                   | 72.8                  | 0.3                   | 7.5             | 6.9             | 6.6             |
| HNT <sub>3</sub> ×OcNH <sub>2</sub> /Pt | 325                   | 267                   | –                     | 6.2             | 3.8             | 3.8             |
| HNT <sub>3</sub> ×MeOH                  | 226                   | 168                   | 0.9                   | 4.6             | 4.0             | 3.9             |
| HNT <sub>3</sub> ×MeOH/Pt               | 346                   | 127                   | –                     | 3.7             | 3.1             | 3.1             |
| HNT <sub>3</sub> ×EtOH                  | 220                   | 153                   | 0.7                   | 4.9             | 4.4             | 4.5             |
| HNT <sub>3</sub> ×EtOH/Pt               | 306                   | 210                   | –                     | 3.6             | 3.1             | 3.1             |
| HNT <sub>3</sub> ×PrOH                  | 271                   | 136                   | 0.3                   | 4.8             | 4.4             | 4.3             |
| HNT <sub>3</sub> ×PrOH/Pt               | 230                   | 133                   | –                     | 3.4             | 3.0             | 3.0             |
| HNT <sub>3</sub> ×BuOH                  | 161                   | 125                   | 0.5                   | 4.9             | 4.5             | 4.4             |
| HNT <sub>3</sub> ×BuOH/Pt               | 199                   | 175                   | –                     | 3.5             | 3.0             | 3.0             |
| HNT <sub>3</sub> ×HxOH                  | 177                   | 146                   | 0.7                   | 4.9             | 4.5             | 4.4             |
| HNT <sub>3</sub> ×HxOH/Pt               | 190                   | 139                   | –                     | 3.6             | 3.0             | 3.0             |
| HNT <sub>3</sub> ×DcOH                  | 181                   | 109                   | 0.4                   | 5.1             | 4.7             | 4.6             |
| HNT <sub>3</sub> ×DcOH/Pt               | 350                   | 247                   | –                     | 3.8             | 3.2             | 3.2             |

## Supporting Information S14

Comparison of actual concentrations of samples in the reaction suspensions in the beginning and in the ending of the photocatalytic measurement

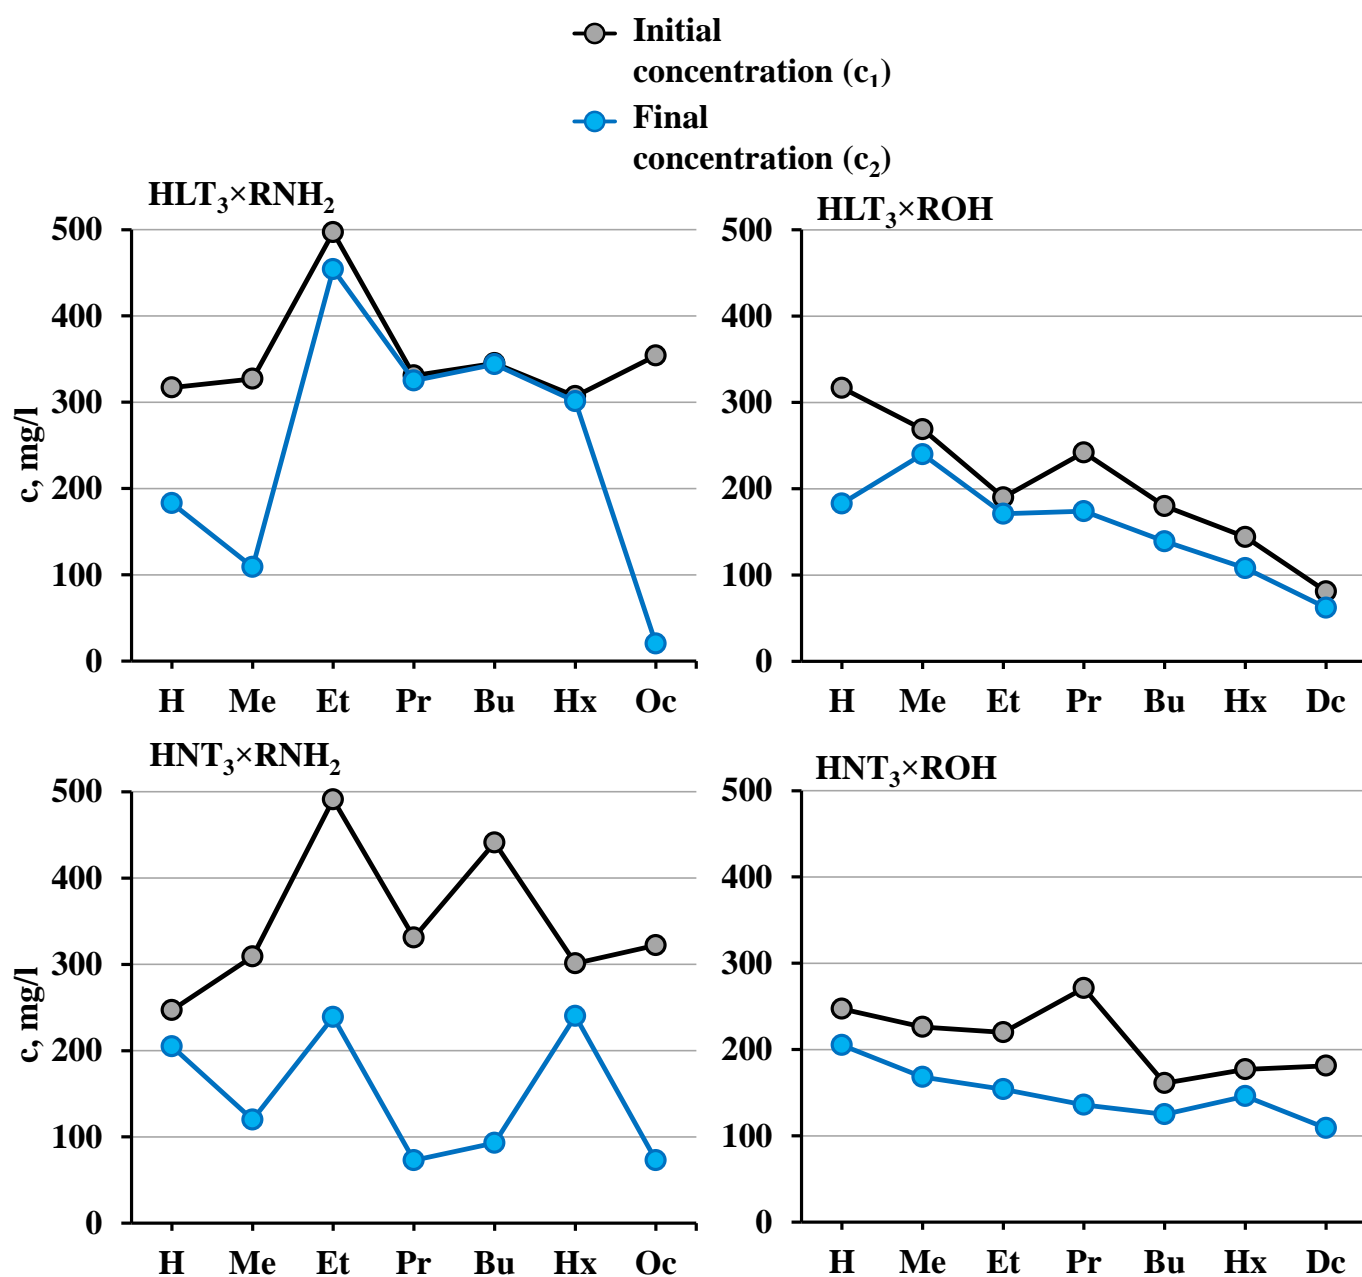

## Supporting Information S15

XRD patterns of some inorganic-organic derivatives before and after photocatalytic (PC) experiments

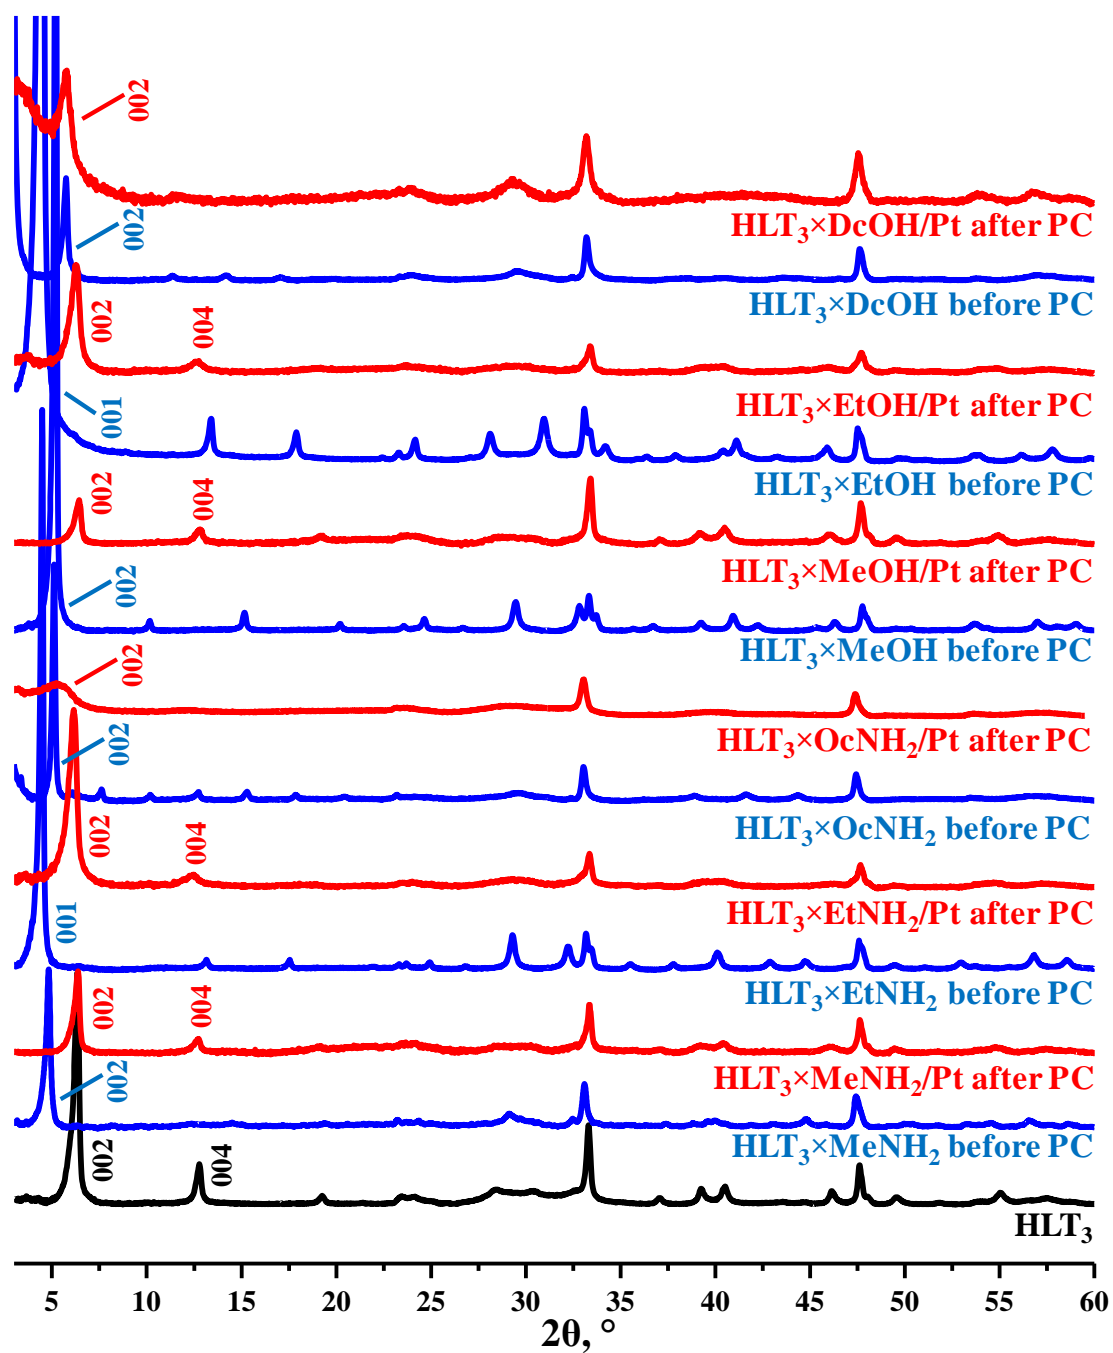



## Supporting Information S16

Raman spectra of some inorganic-organic derivatives before and after photocatalytic (PC) experiments

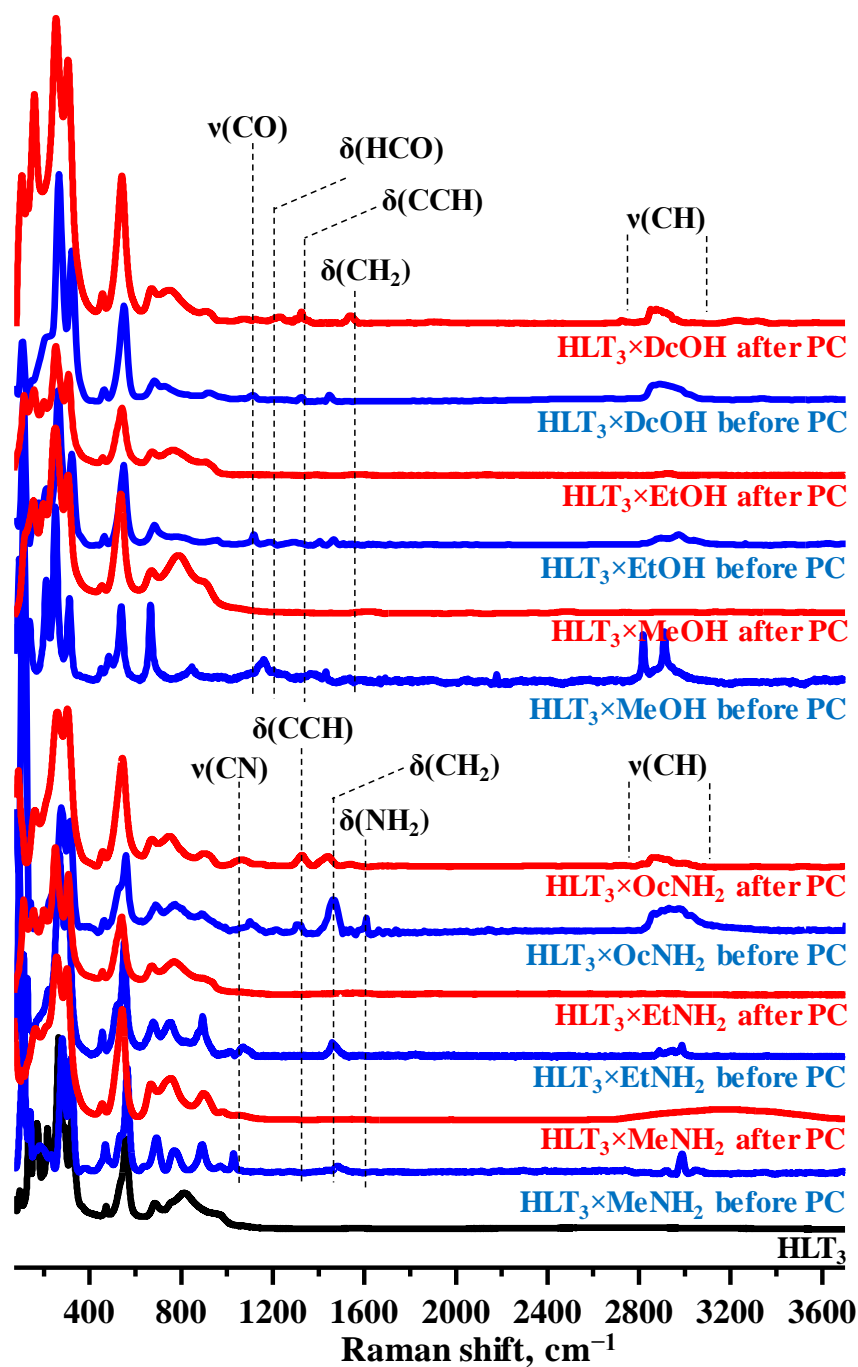

# Supporting Information S17

TG curves of some inorganic-organic derivatives before and after photocatalytic (PC) experiments

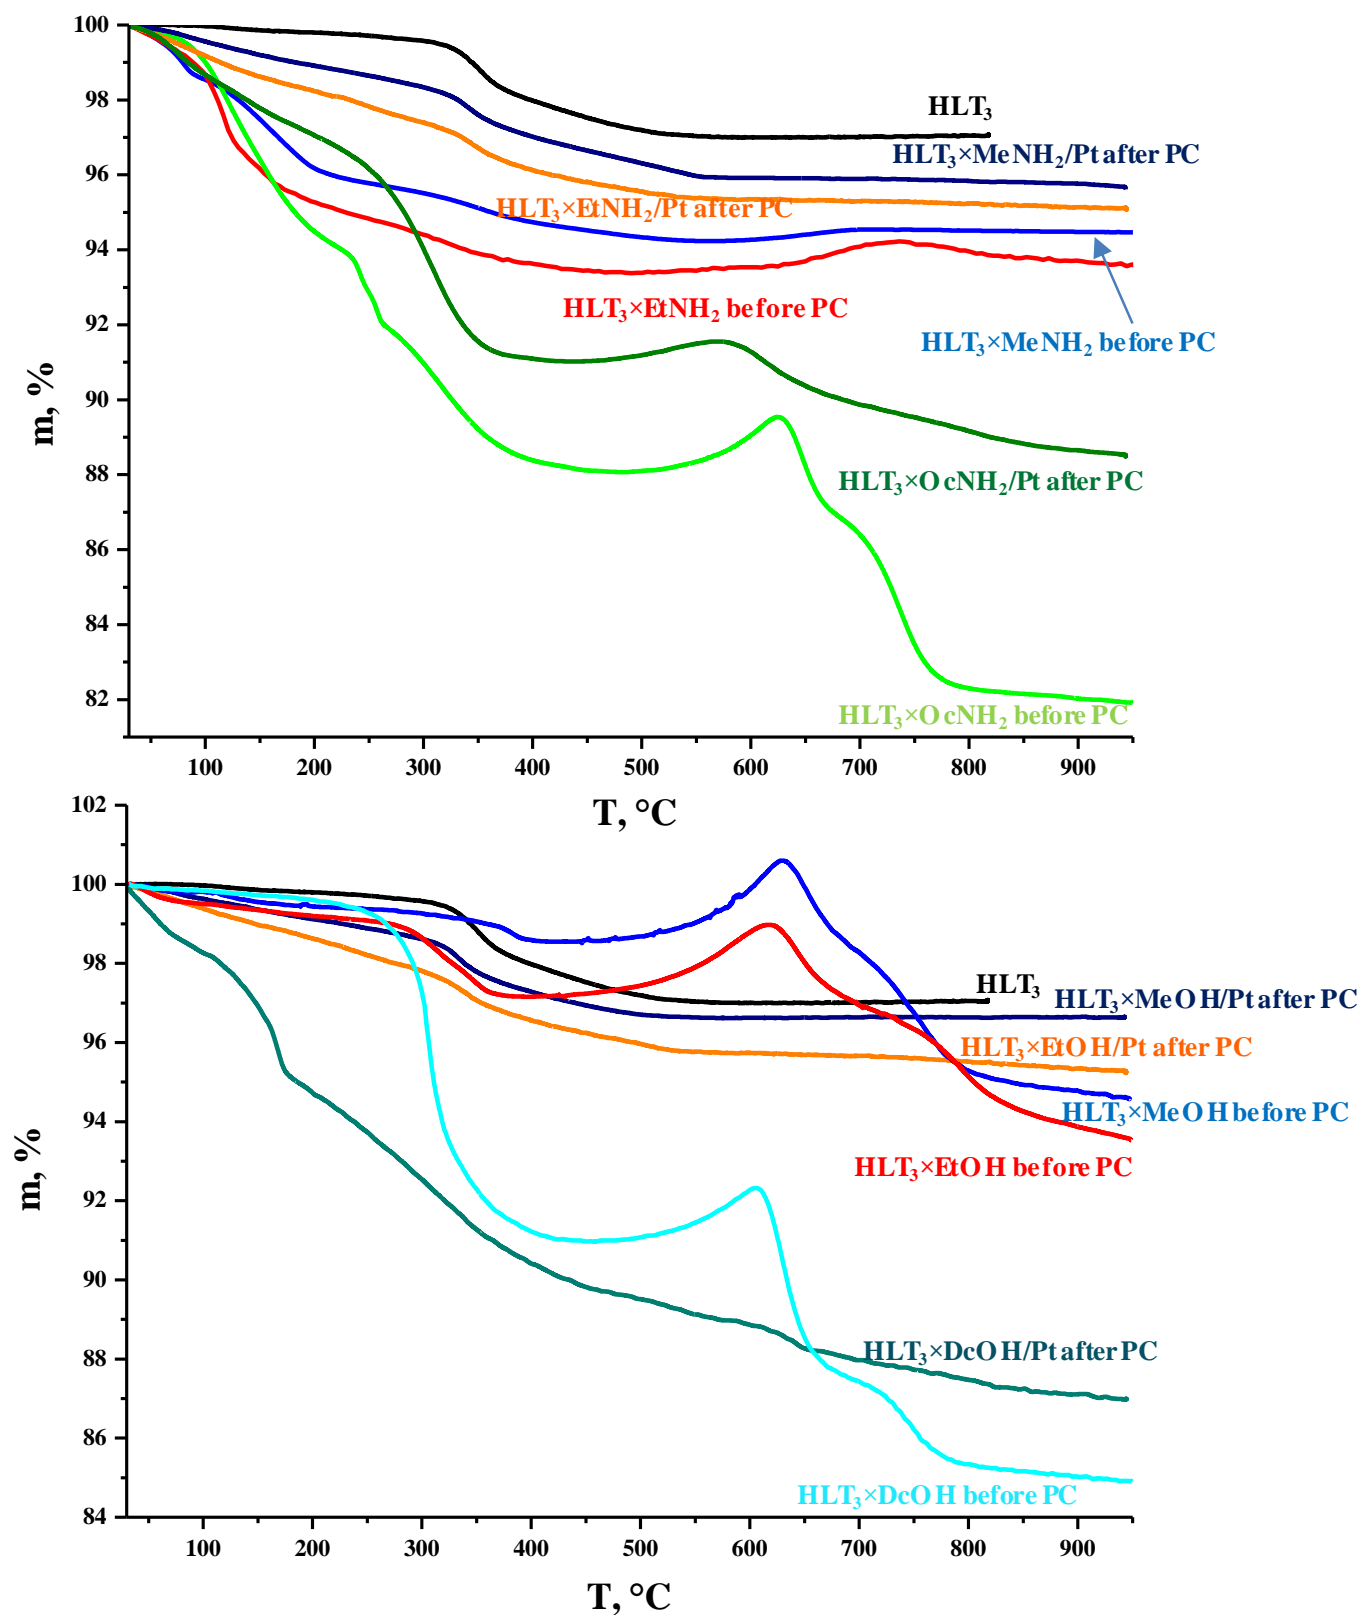

## Supporting Information S18

SEM images of some inorganic-organic derivatives before and after photocatalytic (PC) experiments

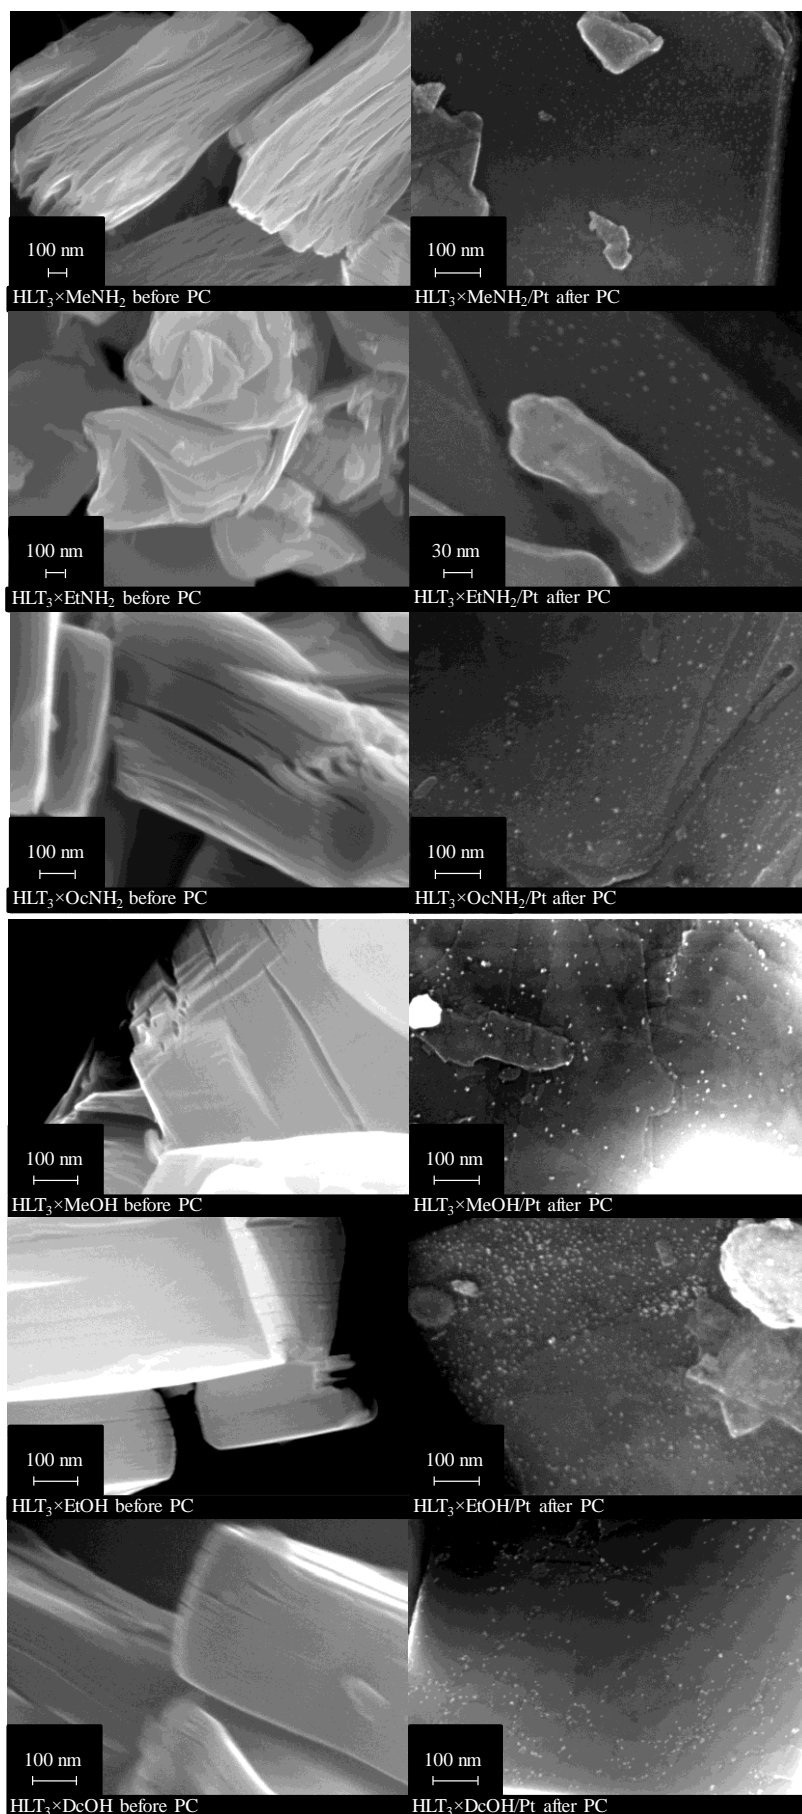

## Supporting Information S19

Scheme of (a) photocatalytic setting and (b) reaction cell

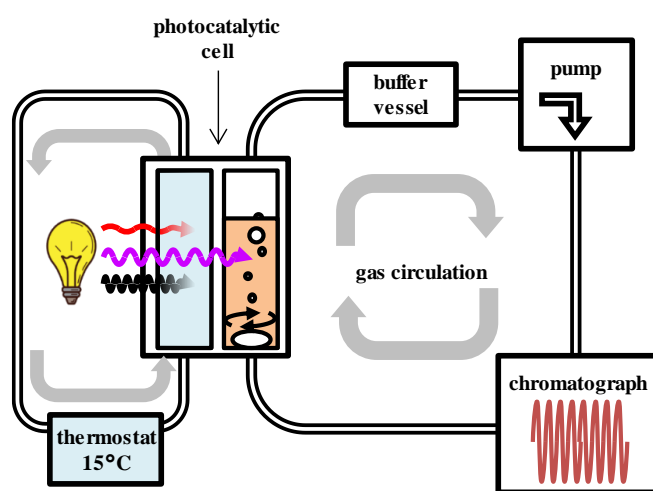

(a)

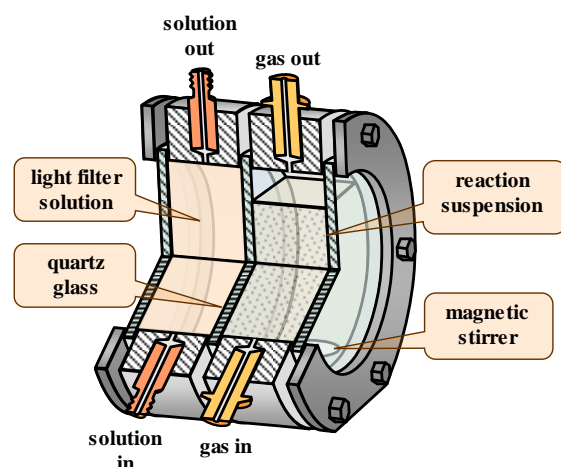

(b)

## Supporting Information S20

### Spectrophotometric calibrations for express measurement of reaction suspensions' concentrations

To prepare the calibration plot for suspensions of bulk non-exfoliated titanates for determination concentrations  $c_1$  and  $c_2$  during photocatalytic experiments, a hitch of each methylamine derivative  $\text{HLT}_3 \times \text{MeNH}_2$  or  $\text{HNT}_3 \times \text{MeNH}_2$ , containing by calculation 0.03 g of the inorganic component (excluding intercalated water) was added to 60 ml of 1 mol. % methanol. Then the mixture was sonicated for 10 min in an Elmasonic S10H bath (60 W). Afterwards, the suspension obtained was used to build the spectrophotometric calibration dependence in coordinates optical density ( $A$ ) – titanate concentration in mg/l ( $c$ ). For this, a series of spectra with various suspension dilutions was recorded, analytical wavelength  $\lambda = 550$  nm was selected and linear approximation of the experimental dependence  $A_\lambda = A_\lambda(c)$  was found using the least-squares method (graphs a, b).

To prepare the calibration plot for suspensions of titanates exfoliated into nanolayers for determination concentration  $c_3$  during photocatalytic experiments, a hitch of each methylamine derivative  $\text{HLT}_3 \times \text{MeNH}_2$  or  $\text{HNT}_3 \times \text{MeNH}_2$ , containing by calculation 0.03 g of the inorganic component (excluding intercalated water) was placed into a glass tube with 30 ml of 0.004 M aqueous tetrabutylammonium hydroxide (TBAOH) and sonicated by a Hielscher UP200St homogenizer (200 W) at half power for 5 min. After shaking at room temperature for 24 h, the suspension was sonicated for 5 min again. Hereafter bulk non-exfoliated particles were separated via centrifuging at the separation factor  $F = 1000$  for 1 h and concentration of the colloidal solution obtained was determined by ICP-AES after preliminary acid digestion. To obtain the calibration plot  $A - c$  (mg/l), a series of spectra with various suspension dilutions was recorded, analytical wavelength  $\lambda = 230$  nm was selected and linear approximation of the experimental dependence  $A_\lambda = A_\lambda(c)$  was found using the least-squares method (graphs c, d).

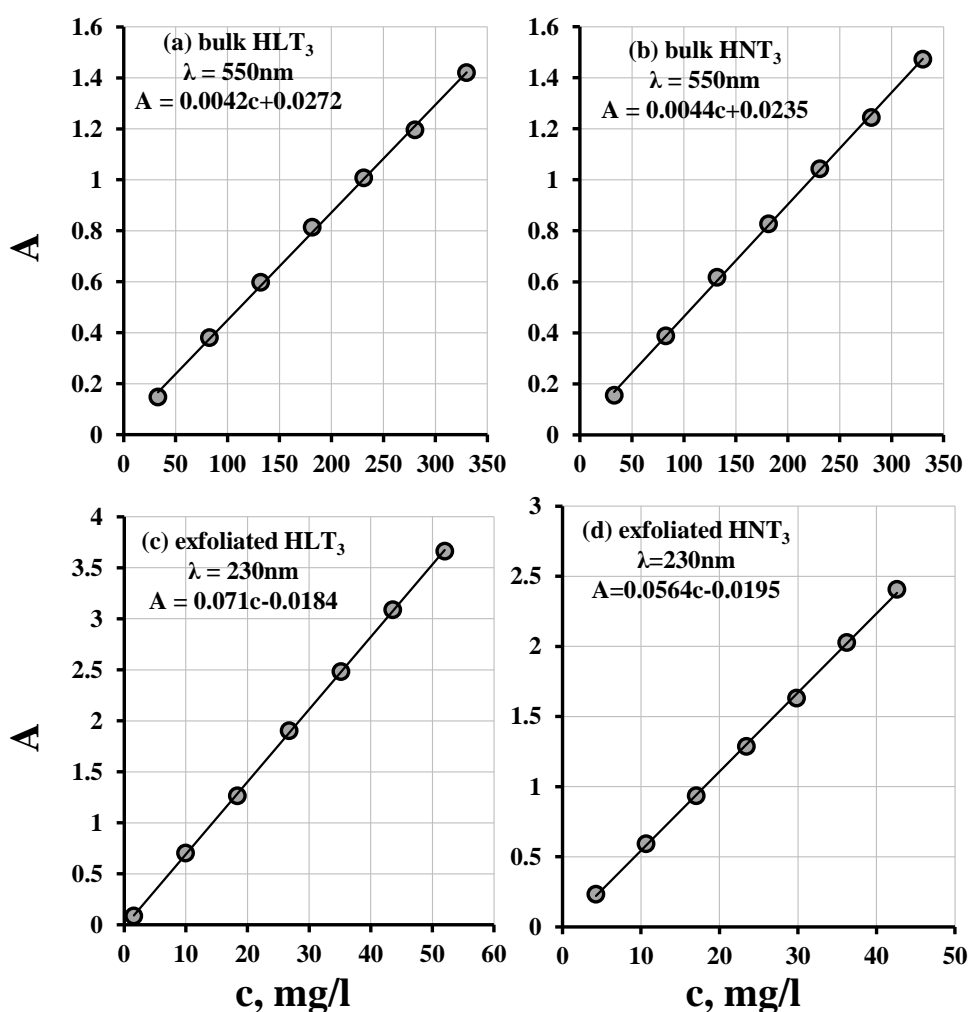

Supplement: s1 [file s1]
